# Supplementary material
Source: HighWire-hosted journal article supplement (https://www.ghspjournal.org/highwire/filestream/5432/field_highwire_adjunct_files/0/GHSP-D-21-00451-supplement.pdf)
Supplement: GHSP-D-21-00451-supplement.pdf [file GHSP-D-21-00451-supplement.pdf]

**Supplement Figure 1. Total number of women enrolled at each time point by study protocol**

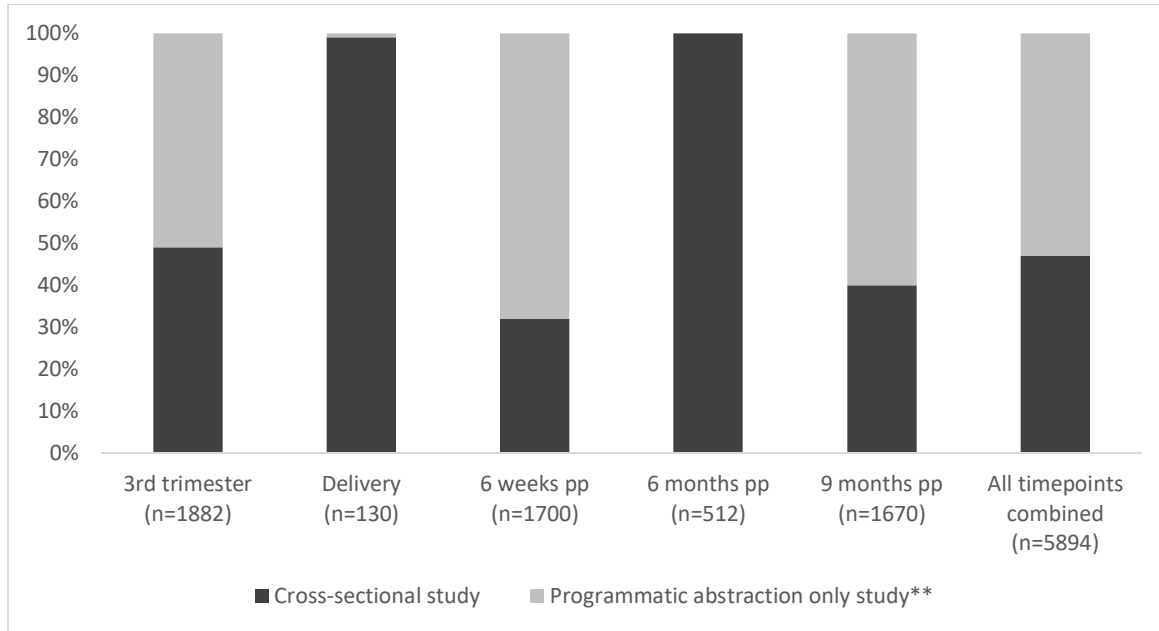

Abbreviation: pp, postpartum. \*\*One woman enrolled into programmatic abstraction only study, who presented for care at 6 weeks postpartum who was HIV positive, was identified as having an incident infection detected through delivery testing during study screening.

**Supplement Figure 2. Prevalence of retesting and complete retesting at each visit, among women in the programmatic abstraction only study**

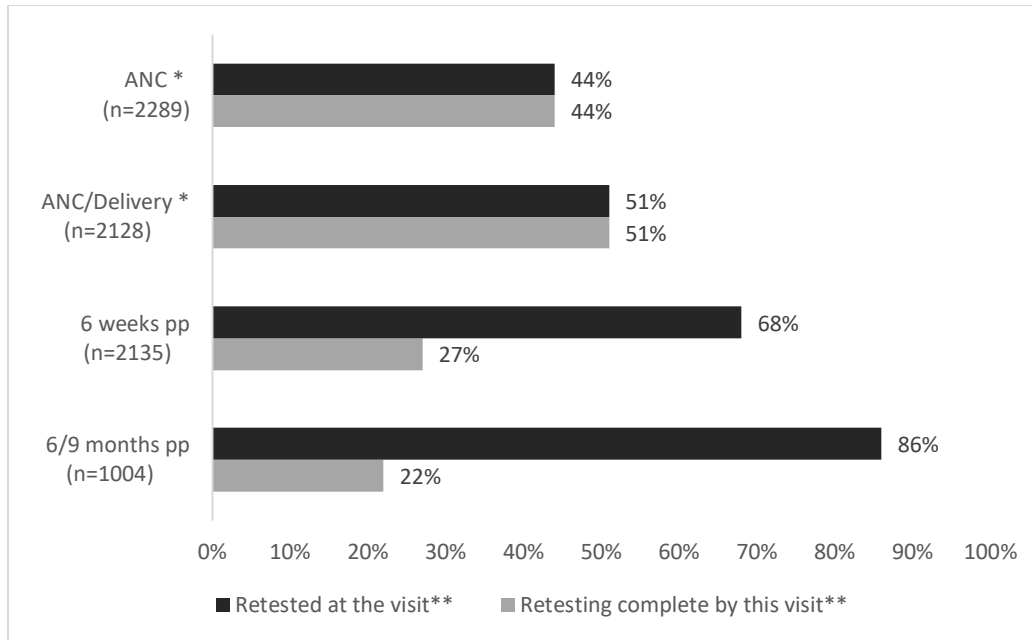

Abbreviations: pp, postpartum; ANC, antenatal care. The proportion of women retesting at each time point was calculated at visits when they enrolled and at all prior time points; therefore, women can be included in multiple time points. \* Only one retest is recommended at these time points as per Kenyan guidelines. \*\* The proportion of women who completed the recommended number of retests up to and including that visit, among women with a recorded visit date. Kenyan guidelines recommend retesting at third trimester/delivery, at 6 weeks postpartum and every 6 months thereafter. Note: Data on facility delivery was not collected and some women may not have delivered at a facility.

**Supplement Table 1. Characteristics of Participants Enrolled in a Programmatic Abstraction Only Study in Kenya, by Enrollment Visit**

|                                                 | All Women (n=3,124) |            | ≥28 Weeks' Gestation (n=954) |            | Delivery/Labor (n=1) <sup>a</sup> |            | 6 Weeks (n=1,160) |            | 6 Months (n=0) |         | 9 Months (n=1,009) |            |
|-------------------------------------------------|---------------------|------------|------------------------------|------------|-----------------------------------|------------|-------------------|------------|----------------|---------|--------------------|------------|
|                                                 | N                   | No. (%)    | n                            | No. (%)    | n                                 | No. (%)    | n                 | No. (%)    | n              | No. (%) | n                  | No. (%)    |
| Age, median (IQR), years                        | 3,119               | 24 (21–28) | 953                          | 24 (21–28) | 1                                 | 31 (31–31) | 1,157             | 24 (21–28) | —              | —       | 1,008              | 24 (21–28) |
| Age range, years                                | 3,119               |            | 953                          |            | 1                                 |            | 1,157             |            | —              | —       | 1,008              |            |
| <21                                             |                     | 684 (22)   |                              | 224 (24)   |                                   | —          |                   | 245 (21)   |                | —       |                    | 215 (21)   |
| 21–30                                           |                     | 1979 (63)  |                              | 584 (61)   |                                   | —          |                   | 742 (64)   |                | —       |                    | 653 (65)   |
| ≥30                                             |                     | 456 (15)   |                              | 145 (15)   |                                   | 1 (100)    |                   | 170 (15)   |                | —       |                    | 140 (14)   |
| Enrollment site                                 | 3,124               |            | 954                          |            | 1                                 |            | 1,160             |            | —              | —       | 1,009              |            |
| Ahero                                           |                     | 439 (14)   |                              | 50 (5)     |                                   | —          |                   | 169 (15)   |                | —       |                    | 220 (22)   |
| Bondo                                           |                     | 727 (23)   |                              | 234 (25)   |                                   | —          |                   | 254 (22)   |                | —       |                    | 239 (24)   |
| Riruta                                          |                     | 974 (31)   |                              | 231 (24)   |                                   | —          |                   | 419 (36)   |                | —       |                    | 324 (32)   |
| Siaya                                           |                     | 506 (16)   |                              | 178 (19)   |                                   | 1 (100)    |                   | 160 (14)   |                | —       |                    | 167 (17)   |
| Rachuonyo                                       |                     | 478 (15)   |                              | 261 (27)   |                                   | —          |                   | 158 (14)   |                | —       |                    | 59 (6)     |
| ANC visits documented, median (IQR)             | 3,124               | 4 (3–5)    | 954                          | 4 (3–4)    | 1                                 | 0 (0–0)    | 1,160             | 4 (3–5)    | —              | —       | 1,009              | 4 (3–5)    |
| PNC visits documented median (IQR) <sup>b</sup> | 2,169               | 2 (2–7)    | —                            | —          | —                                 | —          | 1,160             | 2 (1–2)    | —              | —       | 1,009              | 7 (6–8)    |
| HIV retests, median (IQR) <sup>c</sup>          | 3,124               | 1 (1–2)    | 954                          | 0 (0–1)    | 1                                 | 1 (1–1)    | 1,160             | 1 (1–2)    | —              | —       | 1,009              | 2 (2–3)    |
| Incident HIV-infections                         | 3,124               | 9 (<1)     | 954                          | 3 (<1)     | 1                                 | 1 (100)    | 1,160             | 3 (<1)     | —              | —       | 1,009              | 2 (<1)     |

Abbreviation: ANC, antenatal care; IQR, interquartile range; PNC, postnatal care.

<sup>a</sup> As per MCH booklet documentation. One woman who presented for care at 6 weeks postpartum who was HIV positive, was identified as having an incident infection detected through delivery testing during study screening.

<sup>b</sup> Among women enrolled at postpartum.

<sup>c</sup> Including all HIV tests during most recent pregnancy and postpartum, excluding test done as part of study.

**Supplement Table 2. Correlates of receiving maternal HIV retesting by 9 months postpartum (N=661), cross-sectional study only**

|                                                         | Received HIV retest |                        | N   | Yes [N=566]<br>n (%) or mean (95% CI) | Crude PR <sup>1</sup><br>(95% CI) | P-value      | Adjusted PR <sup>1</sup><br>(95% CI) | P-value |
|---------------------------------------------------------|---------------------|------------------------|-----|---------------------------------------|-----------------------------------|--------------|--------------------------------------|---------|
|                                                         | No [N=95]<br>N      | n (%) or mean (95% CI) |     |                                       |                                   |              |                                      |         |
| <b>Sociodemographic characteristics</b>                 |                     |                        |     |                                       |                                   |              |                                      |         |
| Age category (years)                                    | 95                  |                        | 566 |                                       |                                   |              |                                      |         |
| <21                                                     |                     | 22 (23)                |     | 141 (25)                              | Ref                               |              | Ref                                  |         |
| 21-30                                                   |                     | 62 (65)                |     | 357 (63)                              | 0.98 (0.92-1.05)                  | 0.6          | 0.99 (0.93-1.05)                     | 0.7     |
| >30                                                     |                     | 11 (12)                |     | 68 (12)                               | 1.00 (0.87-1.14)                  | 0.9          | 1.00 (0.88-1.13)                     | 1.0     |
| Enrollment year                                         | 95                  |                        | 566 |                                       |                                   |              |                                      |         |
| 2017                                                    |                     | 44 (46)                |     | 191 (34)                              | Ref                               |              |                                      |         |
| 2018                                                    |                     | 35 (37)                |     | 152 (27)                              | 1.00(0.88-1.13)                   | 1.0          | -                                    | -       |
| 2019                                                    |                     | 16 (17)                |     | 223 (39)                              | 1.15(0.94-1.40)                   | 0.2          | -                                    | -       |
| Completed secondary education                           | 95                  | 52 (55)                | 566 | 299 (53)                              | 0.99 (0.95-1.03)                  | 0.6          | 0.99 (0.96-1.03)                     | 0.7     |
| Neither parent alive                                    | 95                  | 10 (11)                | 566 | 80 (14)                               | 1.04 (0.97-1.12)                  | 0.2          | -                                    | -       |
| Monthly household income ≥10,000KSH                     | 68                  | 31 (46)                | 321 | 147 (46)                              | 1.00 (0.98-1.02)                  | 0.9          | -                                    | -       |
| <b>Relationship characteristics and sexual behavior</b> |                     |                        |     |                                       |                                   |              |                                      |         |
| Married                                                 | 92                  | 51 (55)                | 557 | 381 (68)                              | <b>1.09 (1.02-1.15)</b>           | <b>0.01</b>  | -                                    | -       |
| Polygamous marriage <sup>2</sup>                        | 54                  | 3 (6)                  | 416 | 24 (6)                                | 1.00 (0.87-1.16)                  | 1.0          | -                                    | -       |
| Partner completed secondary education <sup>2</sup>      | 50                  | 41 (82)                | 413 | 285 (69)                              | <b>0.94 (0.90-0.97)</b>           | <b>0.001</b> | -                                    | -       |
| Partner HIV status unknown/positive <sup>2</sup>        | 54                  | 21 (39)                | 422 | 130 (31)                              | 0.96 (0.91-1.01)                  | 0.1          | -                                    | -       |
| Any unprotected sex (last month)                        | 38                  | 33 (87)                | 267 | 238 (89)                              | 1.03 (0.88-1.20)                  | 0.7          | -                                    | -       |
| Lifetime number of sexual partners                      | 95                  | 31 (33)                | 566 | 180 (32)                              | 0.99 (0.93-1.07)                  | 0.9          | -                                    | -       |
| <b>Reproductive history</b>                             |                     |                        |     |                                       |                                   |              |                                      |         |
| Gravidity*                                              | 95                  | 1.64 (1.43-1.85)       | 566 | 1.96 (1.85-2.06)                      | <b>1.03 (1.01-1.05)</b>           | <b>0.004</b> | -                                    | -       |
| Facility delivery (prior pregnancy) <sup>3</sup>        | 34                  | 31 (91)                | 276 | 265 (96)                              | 1.14 (0.97-1.34)                  | 0.1          | -                                    | -       |

Abbreviations: PR, prevalence ratio; CI, confidence interval. <sup>1</sup> Using robust standard errors, <sup>2</sup> Among women with a current partner, <sup>3</sup> Among multiparous women. Variables identified as potential confounders a priori were included in multivariate Poisson GLMs; maternal age, education, and marital status. Due to collinearity, marital status, partner education and gravidity were excluded from the multivariate model. \* Per unit change.

**Supplement Table 3. Correlates of receiving any HIV retests by 9 months postpartum (N=1009), programmatic abstraction only study**

|                                         | Received HIV retest |                                     |     |                                       | Crude PR<br>(95% CI)    | p-value     | Adjusted PR<br>(95% CI) | p- value |
|-----------------------------------------|---------------------|-------------------------------------|-----|---------------------------------------|-------------------------|-------------|-------------------------|----------|
|                                         | N                   | No [N=19]<br>n (%) or mean (95% CI) | N   | Yes [N=990]<br>n (%) or mean (95% CI) |                         |             |                         |          |
| <b>Sociodemographic characteristics</b> |                     |                                     |     |                                       |                         |             |                         |          |
| Age category (years)                    | 19                  |                                     | 989 |                                       |                         |             |                         |          |
| <21                                     |                     | 4 (21)                              |     | 211 (21)                              | Ref                     |             | Ref                     |          |
| 21-30                                   |                     | 13 (68)                             |     | 640 (65)                              | 1.00 (0.99-1.01)        | 0.8         | 1.00 (0.85-1.16)        | 1.0      |
| ≥30                                     |                     | 2 (11)                              |     | 138 (14)                              | 1.00 (0.97-1.04)        | 0.8         | 1.00 (0.81-1.24)        | 1.0      |
| ≥4 ANC visits                           | 19                  | 5 (26)                              | 990 | 610 (62)                              | 1.03 (0.97-1.09)        | 0.3         | -                       | -        |
| ≥7 PNC visits                           | 19                  | 6 (32)                              | 990 | 746 (75)                              | <b>1.04 (0.99-1.10)</b> | <b>0.08</b> | 1.05 (0.90-1.21)        | 0.6      |

Abbreviations: PR, prevalence ratio; CI, confidence interval; ANC, antenatal care; PNC, postnatal care. Variable identified as potential confounders a priori were included in multivariate Poisson GLMs; maternal age.

**Supplement Table 4. Correlates of receiving  $\geq 2$  HIV retests by 9 months postpartum (N=1009), programmatic abstraction only study**

|                                         | Received $\geq 2$ HIV retests |                       |     |                       | Crude PR<br>(95% CI)    | p-value        | Adjusted PR<br>(95% CI) | p- value       |
|-----------------------------------------|-------------------------------|-----------------------|-----|-----------------------|-------------------------|----------------|-------------------------|----------------|
|                                         | No [N=139]                    | Yes [N=870]           |     |                       |                         |                |                         |                |
|                                         | N                             | n (%) or mean (95%CI) | N   | n (%) or mean (95%CI) |                         |                |                         |                |
| <b>Sociodemographic characteristics</b> |                               |                       |     |                       |                         |                |                         |                |
| Age category (years)                    | 138                           |                       | 870 |                       |                         |                |                         |                |
| <21                                     |                               | 24 (17)               |     | 191 (22)              | Ref                     |                | Ref                     |                |
| 21-30                                   |                               | 95 (69)               |     | 558 (64)              | <b>0.96 (0.94-0.99)</b> | <b>&lt;.01</b> | <b>0.96 (0.94-0.99)</b> | <b>&lt;.01</b> |
| $\geq 30$                               |                               | 19 (14)               |     | 121 (14)              | 0.97 (0.87-1.09)        | 0.6            | 0.97 (0.87-1.09)        | 0.6            |
| $\geq 4$ ANC visits                     | 139                           | 58 (42)               | 870 | 557 (64)              | 1.14 (0.97-1.34)        | 0.1            | -                       | -              |
| $\geq 7$ PNC visits                     | 139                           | 79 (57)               | 870 | 673 (77)              | <b>1.17 (1.02-1.34)</b> | <b>0.03</b>    | -                       | -              |

Abbreviations: PR, prevalence ratio; CI, confidence interval; ANC, antenatal care; PNC, postnatal care. Variable identified as potential confounders a priori were included in multivariate Poisson GLMs; maternal age. Due to collinearity, variable PNC visits variable was excluded from the multivariate model.
